# Supplementary material
Source: publisher figshare collection journal article supplement (https://acs.figshare.com/ndownloader/files/3765454)
Supplement: Supplementary file 1 [file 3765454]

## **Supporting Information**

4 figures; 9 tables

### **Improved Environmental Life Cycle Assessment of Crop Production at the Catchment Scale via a Process-Based Nitrogen Simulation Model**

Wenjie Liao\*, Hayo M. G. van der Werf, Jordy Salmon-Monviola

INRA/Agrocampus Ouest, UMR1069, Soil, Agro and hydroSystem, F-35000 Rennes, France

\* Phone: +33 (0)2 23 48 54 31; fax: +33 (0)2 23 48 54 30; e-mail: wenjieliao@outlook.com

#### **Calculation of N<sub>2</sub>O emissions in AGRIBALYSE**

Direct and indirect N<sub>2</sub>O emissions were calculated according to emission factors used in the IPCC

Tier 1 method.<sup>1</sup> However, the effect of land-use change was ignored. Therefore, in AGRIBALYSE,

on-site N<sub>2</sub>O emissions were calculated according to the following equation:

$$F_{N_2O-N} = 0.01 \times (F_{NF} + F_{CR} + 14/17 \times F_{NH_3} + 14/46 \times F_{NOX}) + 0.0075 \times 14/62 \times F_{NO_3}$$

where  $F_{N_2O-N}$  is the amount of on-site N<sub>2</sub>O emissions (kg N/ha);  $F_{NF}$  the amount of N-fertilizer inputs

(kg N/ha);  $F_{CR}$  the amount of N released by crop residues (kg N/ha); and  $F_{NH_3}$ ,  $F_{NOX}$ , and  $F_{NO_3}$  amounts

of on-site  $\text{NH}_3$  volatilisation ( $\text{kg NH}_3/\text{ha}$ ),  $\text{NO}_x$  volatilisation ( $\text{kg NO}_x/\text{ha}$ ), and  $\text{NO}_3^-$  leaching ( $\text{kg NO}_3^-/\text{ha}$ ), respectively.

### **Parameterization and calibration of TNT2**

Predicted discharge measured at the outlet of a catchment was calibrated via trial-and-error within a physically realistic range of parameters.<sup>2</sup> Parameters for denitrification<sup>3</sup> and organic matter mineralization<sup>2,4</sup> were used to calibrate  $\text{NO}_3^-$ -N fluxes at the outlet.

Cropping-system data used by TNT2 for the calibration period (1994-2002) are based on surveys. The land use of Kervidy-Naizin, considered constant in the study, is mainly dedicated to agriculture with intensive livestock farming. Twenty-three farms have fields in this catchment. In 2010, 20% of the total surface was covered by cereals, 30% by maize, and 20% by temporary or permanent grassland; the remaining 30% was dedicated to minor agricultural crops, woods and hedges, and infrastructure (e.g. roads). Animal production includes indoor production of pigs and poultry, fed partly with grains grown in the catchment but mainly with imported grains and protein crops, and intensive production of dairy and beef cattle, fed with forage grown in the catchment supplemented with imported protein crops. A systematic on-field inventory of summer crops was performed from 1993 to 2002.<sup>5</sup> A complementary dataset, from a neighboring catchment with similar farming activities (the Fremeur

catchment, 10 km from Kervidy-Naizin), was used to determine winter land-cover allocation rules and agricultural practices.<sup>6</sup> From these surveys, each farming system was described by its specific crop successions (dates of sowing and harvesting) and manure and mineral fertilizer management (type and quantity). These cropping-system data were used as input into TNT2.

The accuracy of TNT2 predictions was evaluated by comparing daily predicted discharge and  $\text{NO}_3^-$ -N fluxes at the outlet against those observed during the calibration period and calculating the numeric criteria percentage bias (PBIAS<sup>7</sup>), Nash-Sutcliffe index (NS<sup>8</sup>), and coefficient of determination ( $R^2$ ).

The calibration period was designed to cover a wide spectrum of hydrological conditions, including high precipitation (e.g., 1994-1995 and 2000-2001; see Fig. 2a in ESM1 in Salmon-Monviola et al. (2013)<sup>4</sup>). For the calibration period, simulated daily water fluxes accurately reflected observed values, with a NS of 0.82, a  $R^2$  of 0.84, and a PBIAS of -15%. The intensity and temporal dynamics of high precipitation events (1995 and 2000-2001) were well predicted, although the model tended to slightly underestimate water fluxes. The model predicted observed daily  $\text{NO}_3^-$ -N fluxes for the calibration (NS = 0.82,  $R^2$  = 0.83, PBIAS = -7%) period quite well despite of, given negative values of PBIAS, a slight tendency to underestimate  $\text{NO}_3^-$ -N fluxes. Predicted mean soil denitrification (31 kg N/ha/yr) in 1994-2010 was similar to that (32 kg N/ha/yr) predicted by another modeling approach applied to the

same catchment.<sup>9</sup> N mineralization in French soils was estimated as 90-160 kg N/ha/yr,<sup>10,11</sup> while the model predicted mean N mineralization of 120 kg N/ha/yr, which is within the range of observations.

Based on the performance rating<sup>12</sup>, predicted discharge and  $\text{NO}_3^-$ -N fluxes can be considered “good” ( $\text{NS} > 0.65$  and  $|\text{PBIAS}| \leq 15\%$ ) for a calibration period. Considering these results and validation of  $\text{NO}_3^-$  removal by soil denitrification and N mineralization, we consider that TNT2 assesses accurately water and N flows in the Kervidy-Naizin catchment with real cropping systems. From this step, we consider TNT2 is well calibrated and we can test with confidence virtual cropping systems with the combined model TNT-LCA..

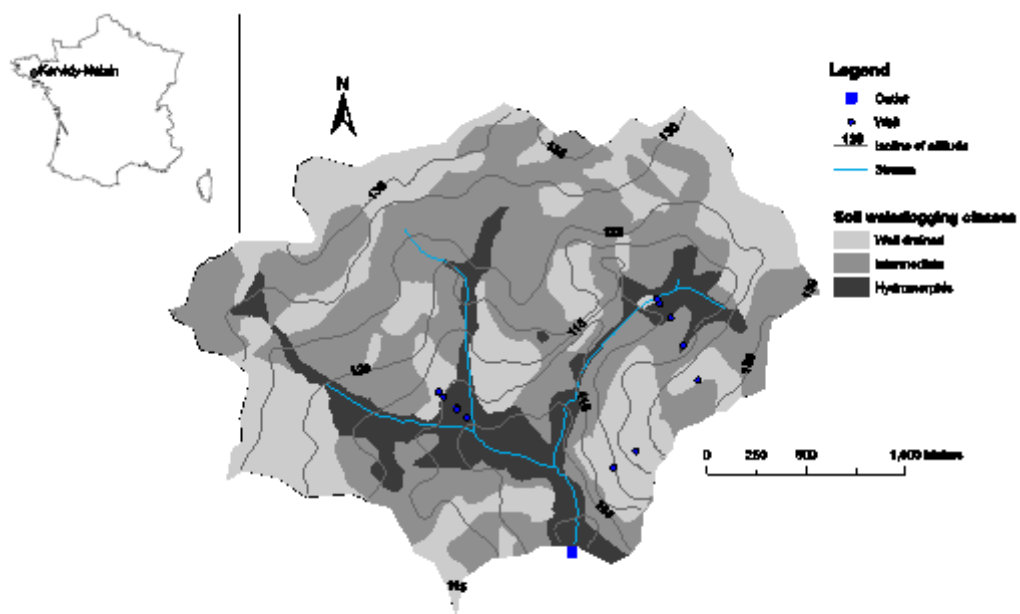

Figure S1. The catchment Kervidy-Naizin in Brittany, western France

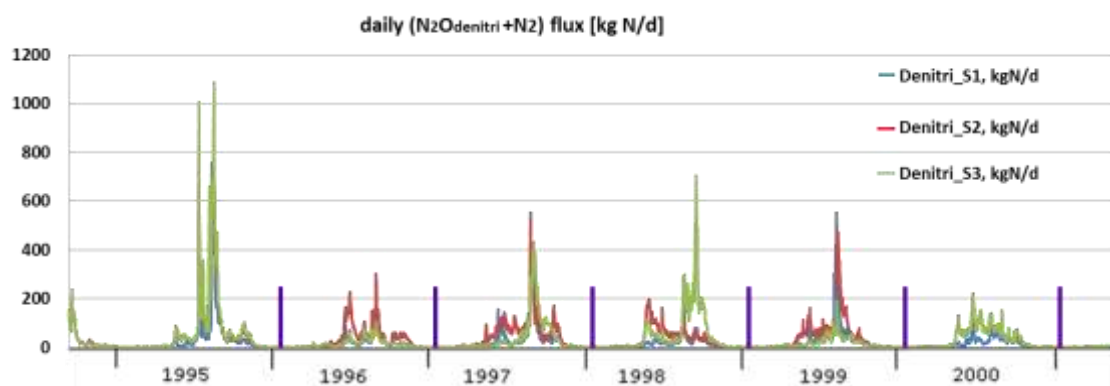

Figure S2. Time series of daily fluxes of total denitrification loss ( $\text{N}_2\text{O}_{\text{denitri}} + \text{N}_2$ ) for the entire catchment (kg N/day). Vertical purple lines represent emission-wave-based inventory periods.

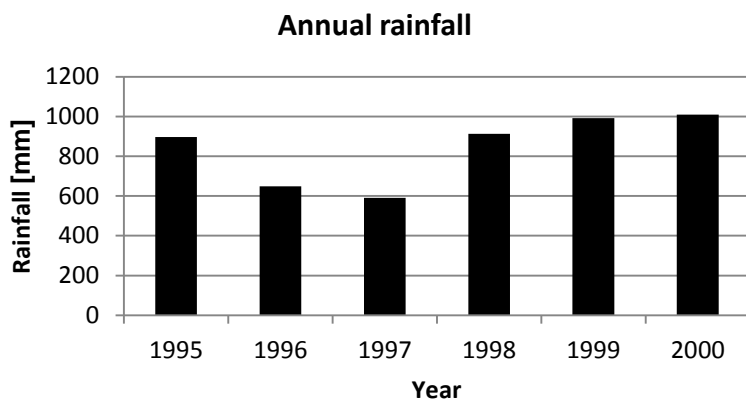

Figure S3. Annual rainfall in the Kervidy-Naizin catchment from 1995-2000

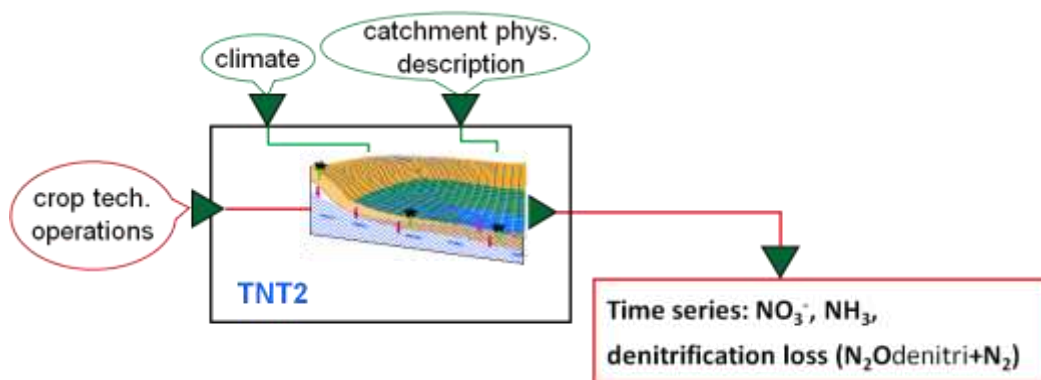

Figure S4. Parameters and input/output data of TNT2. Green lines stand for parameters and red lines for input/output data. Climate parameters: temperature, rainfall, global radiation, and potential evapotranspiration. Parameters for catchment physical description: digital elevation model (20m\*20m), hydrological network, soil types and raster maps, field types and raster maps, water discharge observed at the outlet of a catchment. Crop technical operations (and crop sequences): sowing, fertilization, grazing, harvesting, etc.

Table S1. Substances, impact categories, and characterisation factors used in TNT2-LCA

| Substance           | Formula                      | Pathway | Climate Change                                | Eutrophication                                         |
|---------------------|------------------------------|---------|-----------------------------------------------|--------------------------------------------------------|
|                     |                              |         | GWP100 (kg CO <sub>2</sub> eq.) <sup>13</sup> | EP (kg PO <sub>4</sub> <sup>-</sup> eq.) <sup>14</sup> |
| Ammonia             | NH <sub>3</sub>              | air     |                                               | 0.35                                                   |
| Carbon dioxide      | CO <sub>2</sub>              | air     | 1                                             |                                                        |
| Dinitrogen monoxide | N <sub>2</sub> O             | air     | 298                                           |                                                        |
| Methane             | CH <sub>4</sub>              | air     | 25                                            |                                                        |
| Nitrate             | NO <sub>3</sub> <sup>-</sup> | water   |                                               | 0.10                                                   |
| Nitrogen oxides     | NO <sub>x</sub>              | air     |                                               | 0.13                                                   |
| Phosphate           | PO <sub>4</sub> <sup>-</sup> | water   |                                               | 1                                                      |
| Phosphorus          | P                            | water   |                                               | 3.06                                                   |

Table S2 Crop technical operations, based on survey data, assumed for the three cropping systems in TNT2-LCA

| Crop           | Date         | Operation                     | Type                          | Rate, kg N/ha |
|----------------|--------------|-------------------------------|-------------------------------|---------------|
| Grass          | August 31    | sowing                        | grass                         |               |
|                | March 1      | applying mineral N fertilizer |                               | 25.0          |
|                | April 4      | applying mineral N fertilizer |                               | 50.0          |
|                | June 1       | grazing                       |                               |               |
|                | July 30      | grazing                       |                               |               |
|                | September 15 | grazing                       |                               |               |
| Silage maize   | April 25     | sowing                        | silage maize                  |               |
|                | April 26     | applying organic N fertilizer | pig slurry                    | 258.5         |
|                | April 27     | applying organic N fertilizer | cattle slurry                 | 68.9          |
|                | September 24 | harvesting                    | whole plant                   |               |
| Wheat          | October 25   | sowing                        | wheat                         |               |
|                | October 26   | applying organic N fertilizer | cattle slurry                 | 55.0          |
|                | February 10  | applying mineral N fertilizer |                               | 200.0         |
|                | July 24      | harvesting                    | grain                         |               |
| Pea            | March 15     | sowing                        | pea                           |               |
|                | May 30       | applying mineral N fertilizer |                               | 49.9          |
|                | July 1       | harvesting                    | grain                         |               |
| Potato         | April 15     | sowing                        | potato                        |               |
|                | April 16     | applying mineral N fertilizer |                               | 124.0         |
|                | July 14      | harvesting                    | tuber                         |               |
| Rapeseed       | September 5  | sowing                        | rapeseed                      |               |
|                | September 6  | applying organic N fertilizer | pig slurry                    | 159.6         |
|                | March 15     | applying mineral N fertilizer |                               | 90.0          |
|                | July 4       | harvesting                    | grain                         |               |
| Mustard, early | September 2  | sowing                        | mustard                       |               |
|                | February 28  | harvesting                    | whole plant left on the field |               |
| Mustard        | October 2    | sowing                        | mustard                       |               |
|                | March 1      | harvesting                    | whole plant left on the field |               |

Table S3. Climate change impacts (kg CO<sub>2</sub> eq./ha/yr) estimated by AGRIBALYSE and TNT2-LCA for the three systems under study. Results for TNT2 are based on the percentage of total denitrification loss that is N<sub>2</sub>O, set at 0.3% and 60%. Mean values are followed by the standard deviation in brackets.

| Method                              | Syst. | C1    | C2   | C3   | C4    | C5   | C6   | Mean        |
|-------------------------------------|-------|-------|------|------|-------|------|------|-------------|
| AGRIBALYSE                          | S1    | 1667  | 1667 | 1667 | 1667  | 1667 | 1667 | 1667 (0)    |
|                                     | S2    | 2342  | 2342 | 2342 | 2342  | 2342 | 2342 | 2342 (0)    |
|                                     | S3    | 2342  | 2840 | 929  | 3503  | 2854 | 2342 | 2469 (792)  |
| TNT2-LCA<br>(N <sub>2</sub> O=0.3%) | S1    | 1653  | 1635 | 1646 | 1635  | 1644 | 1635 | 1641 (7)    |
|                                     | S2    | 1109  | 1086 | 1098 | 1085  | 1095 | 1087 | 1093 (9)    |
|                                     | S3    | 1112  | 1644 | 563  | 2385  | 1582 | 1087 | 1395 (569)  |
| TNT2-LCA<br>(N <sub>2</sub> O=60%)  | S1    | 7778  | 4207 | 6223 | 4016  | 5895 | 4192 | 5385 (1377) |
|                                     | S2    | 11157 | 6588 | 9041 | 6352  | 8341 | 6853 | 8055 (1692) |
|                                     | S3    | 11734 | 3904 | 6367 | 10842 | 4128 | 6794 | 7295 (3026) |

Table S4. Eutrophication impacts (kg PO<sub>4</sub><sup>-</sup> eq./ha/yr) estimated by AGRIBALYSE and TNT2-LCA for the three systems under study. Mean values are followed by the standard deviation in brackets.

| Method     | Syst. | C1   | C2   | C3   | C4   | C5   | C6   | Mean        |
|------------|-------|------|------|------|------|------|------|-------------|
| AGRIBALYSE | S1    | 13.4 | 13.4 | 13.4 | 13.4 | 13.4 | 13.4 | 13.4 (0.0)  |
|            | S2    | 31.3 | 31.3 | 31.3 | 31.3 | 31.3 | 31.3 | 31.3 (0.0)  |
|            | S3    | 31.3 | 24.0 | 18.7 | 23.7 | 24.4 | 36.6 | 26.5 (5.8)  |
| TNT2-LCA   | S1    | 15.7 | 11.8 | 15.9 | 16.7 | 18.8 | 27.8 | 17.8 (4.9)  |
|            | S2    | 34.9 | 29.8 | 42.2 | 44.4 | 48.8 | 68.3 | 44.7 (12.2) |
|            | S3    | 35.8 | 16.3 | 19.4 | 31.3 | 29.8 | 55.8 | 31.4 (12.8) |

Table S5. On-site N<sub>2</sub>O emissions (kg N<sub>2</sub>O-N/ha/yr) estimated by AGRIBALYSE and TNT2-LCA for the three systems under study. Predictions of TNT2-LCA are based on a percentage of total denitrification loss that is N<sub>2</sub>O equal to 11%. Mean values are followed by the standard deviation in brackets. HtH: harvest to harvest

| Model      | Period                     | Syst. | C1  | C2  | C3  | C4  | C5  | C6  | Mean      |
|------------|----------------------------|-------|-----|-----|-----|-----|-----|-----|-----------|
| AGRIBALYSE | Calendar year              | S1    | 0.1 | 0.1 | 0.1 | 0.1 | 0.1 | 0.1 | 0.1 (0.0) |
|            | HtH                        | S2    | 2.7 | 2.7 | 2.7 | 2.7 | 2.7 | 2.7 | 2.7 (0.0) |
|            | HtH                        | S3    | 2.7 | 2.6 | 0.8 | 2.5 | 2.8 | 2.7 | 2.4 (0.7) |
| TNT2-LCA   | Emission-wave-based period | S1    | 2.4 | 1.0 | 1.8 | 0.9 | 1.7 | 1.0 | 1.5 (0.5) |
|            |                            | S2    | 4.0 | 2.2 | 3.1 | 2.1 | 2.9 | 2.3 | 2.7 (0.7) |
|            |                            | S3    | 4.2 | 0.9 | 2.3 | 3.3 | 1.0 | 2.2 | 2.3 (1.2) |



Table S6. On-site N<sub>2</sub>O emissions (kg N<sub>2</sub>O-N/ha/yr) estimated by AGRIBALYSE and TNT2-LCA for the three systems under study. Predictions of TNT2-LCA are based on a percentage of total denitrification loss that is N<sub>2</sub>O equal to 0.8%. Mean values are followed by the standard deviation in brackets. HtH: harvest to harvest

| Model      | Period                     | Syst. | C1  | C2  | C3  | C4  | C5  | C6  | Mean      |
|------------|----------------------------|-------|-----|-----|-----|-----|-----|-----|-----------|
| AGRIBALYSE | Calendar year              | S1    | 0.1 | 0.1 | 0.1 | 0.1 | 0.1 | 0.1 | 0.1 (0.0) |
|            | HtH                        | S2    | 2.7 | 2.7 | 2.7 | 2.7 | 2.7 | 2.7 | 2.7 (0.0) |
|            | HtH                        | S3    | 2.7 | 2.6 | 0.8 | 2.5 | 2.8 | 2.7 | 2.4 (0.7) |
| TNT2       | Emission-wave-based period | S1    | 0.2 | 0.1 | 0.1 | 0.1 | 0.1 | 0.1 | 0.1 (0.1) |
|            |                            | S2    | 0.4 | 0.2 | 0.2 | 0.2 | 0.2 | 0.2 | 0.2 (0.1) |
|            |                            | S3    | 0.4 | 0.1 | 0.2 | 0.2 | 0.1 | 0.2 | 0.2 (0.1) |

Table S7. Ranges of on-site N<sub>2</sub>O emissions (kg N<sub>2</sub>O-N/ha) for wheat and rapeseed produced in the Brittany region, France, according to this study and AGRIBALYSE, and according to Gabrielle et al.<sup>4</sup> in the Ile de France region, France.

| Crop     | This study | AGRIBALYSE | Gabrielle et al. <sup>15</sup> |
|----------|------------|------------|--------------------------------|
| Wheat    | 0.02-4.80  | 2.60       | 0.11-2.98                      |
| Rapeseed | 0.03-5.50  | 2.80       | 0.10-0.87                      |

Table S8. Dry-matter crop yield predicted by TNT2 for six annual crops/grass (C1-C6) of three cropping systems (S1-S3) and compared to those estimated by AGRIBALYSE

| Syst. | Period <sup>1</sup>     | Crop         | Harvested         | Yield, kg dry matter/ha |            | Diff. <sup>3</sup> |
|-------|-------------------------|--------------|-------------------|-------------------------|------------|--------------------|
|       |                         |              |                   | TNT2                    | AGRIBALYSE |                    |
| S1_C1 | 1 Jan 1995-31 Dec 1995  | grass        | n.a. <sup>2</sup> | 7289                    | 7380       | -1%                |
| S1_C2 | 1 Jan 1996-31 Dec 1996  | grass        | n.a.              | 7690                    | 7380       | 4%                 |
| S1_C3 | 1 Jan 1997-31 Dec 1997  | grass        | n.a.              | 8563                    | 7380       | 16%                |
| S1_C4 | 1 Jan 1998-31 Dec 1998  | grass        | n.a.              | 9296                    | 7380       | 26%                |
| S1_C5 | 1 Jan 1999-31 Dec 1999  | grass        | n.a.              | 8442                    | 7380       | 14%                |
| S1_C6 | 1 Jan 2000-31 Dec 2000  | grass        | n.a.              | 9479                    | 7380       | 28%                |
| S1    | Mean                    | grass        | n.a.              | 8460                    | 7380       | 15%                |
| S2_C1 | 30 Aug 1994-24 Sep 1995 | silage maize | whole plant       | 18446                   | 12200      | 51%                |
| S2_C2 | 25 Sep 1996-24 Sep 1996 | silage maize | whole plant       | 13718                   | 12200      | 12%                |
| S2_C3 | 25 Sep 1997-24 Sep 1997 | silage maize | whole plant       | 16818                   | 12200      | 38%                |
| S2_C4 | 25 Sep 1998-24 Sep 1998 | silage maize | whole plant       | 17133                   | 12200      | 40%                |
| S2_C5 | 25 Sep 1999-24 Sep 1999 | silage maize | whole plant       | 20401                   | 12200      | 67%                |
| S2_C6 | 25 Sep 2000-24 Sep 2000 | silage maize | whole plant       | 18053                   | 12200      | 48%                |
| S2    | Mean                    | silage maize | whole plant       | 17428                   | 12200      | 43%                |
| S3_C1 | 30 Aug 1994-24 Sep 1995 | silage maize | whole plant       | 18501                   | 12200      | 52%                |
| S3_C2 | 25 Sep 1995-24 Jul 1996 | wheat        | grain             | 8178                    | 6035       | 36%                |
| S3_C3 | 25 Jul 1996-1 Jul 1997  | pea          | grain             | 5520                    | 3910       | 41%                |
| S3_C4 | 2 Jul 1997-14 Jul 1998  | potato       | tuber             | 9025                    | 8983       | 0%                 |
| S3_C5 | 15 Jul 1998-4 Jul 1999  | rapeseed     | grain             | 5029                    | 2951       | 70%                |
| S3_C6 | 5 Jul 1999-24 Sep 2000  | silage maize | whole plant       | 18064                   | 12200      | 48%                |
| S3    | Mean                    |              |                   | 10720                   | 7713       | 39%                |

<sup>1</sup> Period: for grazed grass, one calendar year; for an annual crop, “harvest to harvest”

<sup>2</sup> n.a.: not applicable, as grass was only grazed

<sup>3</sup> Diff.: relative difference in TNT2-predicted yield compared to that estimated by AGRIBALYSE

Table S9. Crops that are available in AGRIBALYSE (v1.1), crops that are validated in TNT2, and crops that can be studied using TNT2-LCA. Y: Yes.

| Crop               | Applicability |      |          |
|--------------------|---------------|------|----------|
|                    | AGRIBALYSE    | TNT2 | TNT2-LCA |
| alfalfa            | Y             |      |          |
| annual ryegrass    |               | Y    |          |
| apple              | Y             |      |          |
| barley             | Y             | Y    | Y        |
| broccoli           |               | Y    |          |
| cabbage            |               | Y    |          |
| carrot             | Y             |      |          |
| cider apple        | Y             |      |          |
| clementine         | Y             |      |          |
| cocoa              | Y             |      |          |
| coffee             | Y             |      |          |
| faba bean          | Y             |      |          |
| haricot bean       |               | Y    |          |
| grain maize        | Y             | Y    | Y        |
| grass              | Y             | Y    | Y        |
| jasmine rice       | Y             |      |          |
| mango              | Y             |      |          |
| oat                |               | Y    |          |
| oil palm fruit     | Y             |      |          |
| ornamental shrub   | Y             |      |          |
| pea                | Y             | Y    | Y        |
| peach              | Y             |      |          |
| perennial ryegrass |               | Y    |          |
| potato             | Y             | Y    | Y        |
| rapeseed           | Y             | Y    | Y        |
| rose               | Y             |      |          |
| shallot            |               | Y    |          |
| silage maize       | Y             | Y    | Y        |
| spinach            |               | Y    |          |
| sugar beet         | Y             | Y    | Y        |
| sunflower          | Y             |      |          |
| tomato             | Y             |      |          |
| triticale          | Y             | Y    | Y        |
| wheat              | Y             | Y    | Y        |
| white mustard      |               | Y    |          |
| wine grape         | Y             |      |          |

## References

- (1) IPCC, 2006. 2006 IPCC Guidelines for National Greenhouse Gas Inventories, Prepared by the National Greenhouse Gas Inventories Programme. In: Eggleston, H.S., Buendia, L., Miwa, K., Ngara, T., Tanabe, K. (Eds.). IGES, Japan.
- (2) Benhamou, C., Salmon-Monviola, J., Durand, P., Grimaldi, C., Merot, P., 2013. Modeling the interaction between fields and a surrounding hedgerow network and its impact on water and nitrogen flows of a small watershed. *Agricultural Water Management* 121, 62-72.
- (3) Oehler, F., Durand, P., Bordenave, P., Saadi, Z., Salmon-Monviola, J., 2009. Modelling denitrification at the catchment scale. *Science of The Total Environment* 407, 1726-1737.
- (4) Salmon-Monviola, J., Moreau, P., Benhamou, C., Durand, P., Merot, P., Oehler, F., Gascuel-Odoux, C., 2013. Effect of climate change and increased atmospheric CO<sub>2</sub> on hydrological and nitrogen cycling in an intensive agricultural headwater catchment in western France. *Climatic Change* 120, 433-447.
- (5) Bordenave, P., Oehler, F., Turpin, N., Bioteau, T., Serrand, P., Saint-Cast, P., Le Saos, E., 2005. Distributed surface groundwater coupled model applied to long-term water management impacts at basin scale. *Ingenieries* 44, 13-36.
- (6) Durand, P., Ferchaud, F., Salmon-Monviola, J., Goetschel, F., Martin, C., 2006. Etude sur l'évolution des paramètres nitrates dans les eaux brutes des bassins versants Bretagne Eau Pure et

des autres bassins versants bretons. Démarche Evaluation Programme Bretagne Eau Pure, Rapport INRA, INRA, Paris.

- (7) Yapo, P. O., Gupta, H. V., Sorooshian, S., 1996. Automatic calibration of conceptual rainfall-runoff models: sensitivity to calibration data. *Journal of Hydrology* 181, 23-48.
- (8) Nash, J. E., Sutcliffe, J. V., 1970. River flow forecasting through conceptual models part I - A discussion of principles. *Journal of Hydrology* 10, 282-90.
- (9) Oehler, F., Bordenave, P., Durand, P., 2007. Variations of denitrification in a farming catchment area. *Agriculture, Ecosystems & Environment* 120, 313-324.
- (10) Mary, B., Rémy, J., 1979. Essai d'appréciation de la capacité de minéralisation de l'azote des sols de grande culture. Signification des cinétiques de minéralisation de la matière organique humifiée. *Annales agronomiques* 30, 513-527.
- (11) Mary, B., Recous, S., Darwis, D., Robin, D., 1996. Interactions between decomposition of plant residues and nitrogen cycling in soil. *Plant and Soil* 181, 71-82.
- (12) Moriasi, D. N., Arnold, J. G., van Liew, M. W., Bingner, R. L., Harmel, R. D., Veith, T. L., 2007. Model evaluation guidelines for systematic quantification of accuracy in watershed simulations. *Transactions of ASABE* 50, 885-900.
- (13) Forster, P., Ramaswamy, V., Artaxo, P., Berntsen, T., Betts, R., Fahey, D. W., Haywood, J., Lean, J., Lowe, D. C., Myhre, G., Nganga, J., Prinn, R., Raga, G., Schulz, M., Van Dorland, R.,

2007. Changes in atmospheric constituents and in radiative forcing. Chapter 2, in: Solomon, S., Qin, D., Manning, M., Chen, Z., Marquis, M., Averyt, K. B., Tignor, M., Miller, H. L. (Eds.), Climate change 2007: the physical science basis. Contribution of Working Group I to the Fourth Assessment Report of the Intergovernmental Panel on Climate Change. Cambridge University Press, Cambridge, UK.
- (14) Heijungs, R., Guinée, J. B., Huppes, G., Lankreijer, R. M., Udo de Haes, H. A., Wegener Sleeswijk, A., Ansems, A. M. M., Eggels, P. G., van Duin, R., de Goede, H. P., 1992. Environmental life cycle assessment of products: guide and backgrounds (Part 1). CML, Leiden University, Leiden, the Netherlands, p. 96.
- (15) Gabrielle, B., Gagnaire, N., Massad, R. S., Dufossé, K., Bessou, C., 2014. Environmental assessment of biofuel pathways in Ile de France based on ecosystem modeling. Bioresource Technology 152, 511-518.
